# Supplementary material for: Intra-Patient Genomic Variations of Human Papillomavirus Type 31 in Cervical Cancer and Precancer
Source: MDPI journal article supplement (doi:10.3390/v15102104), 2023-10-17
Supplement: s1 [file s1]

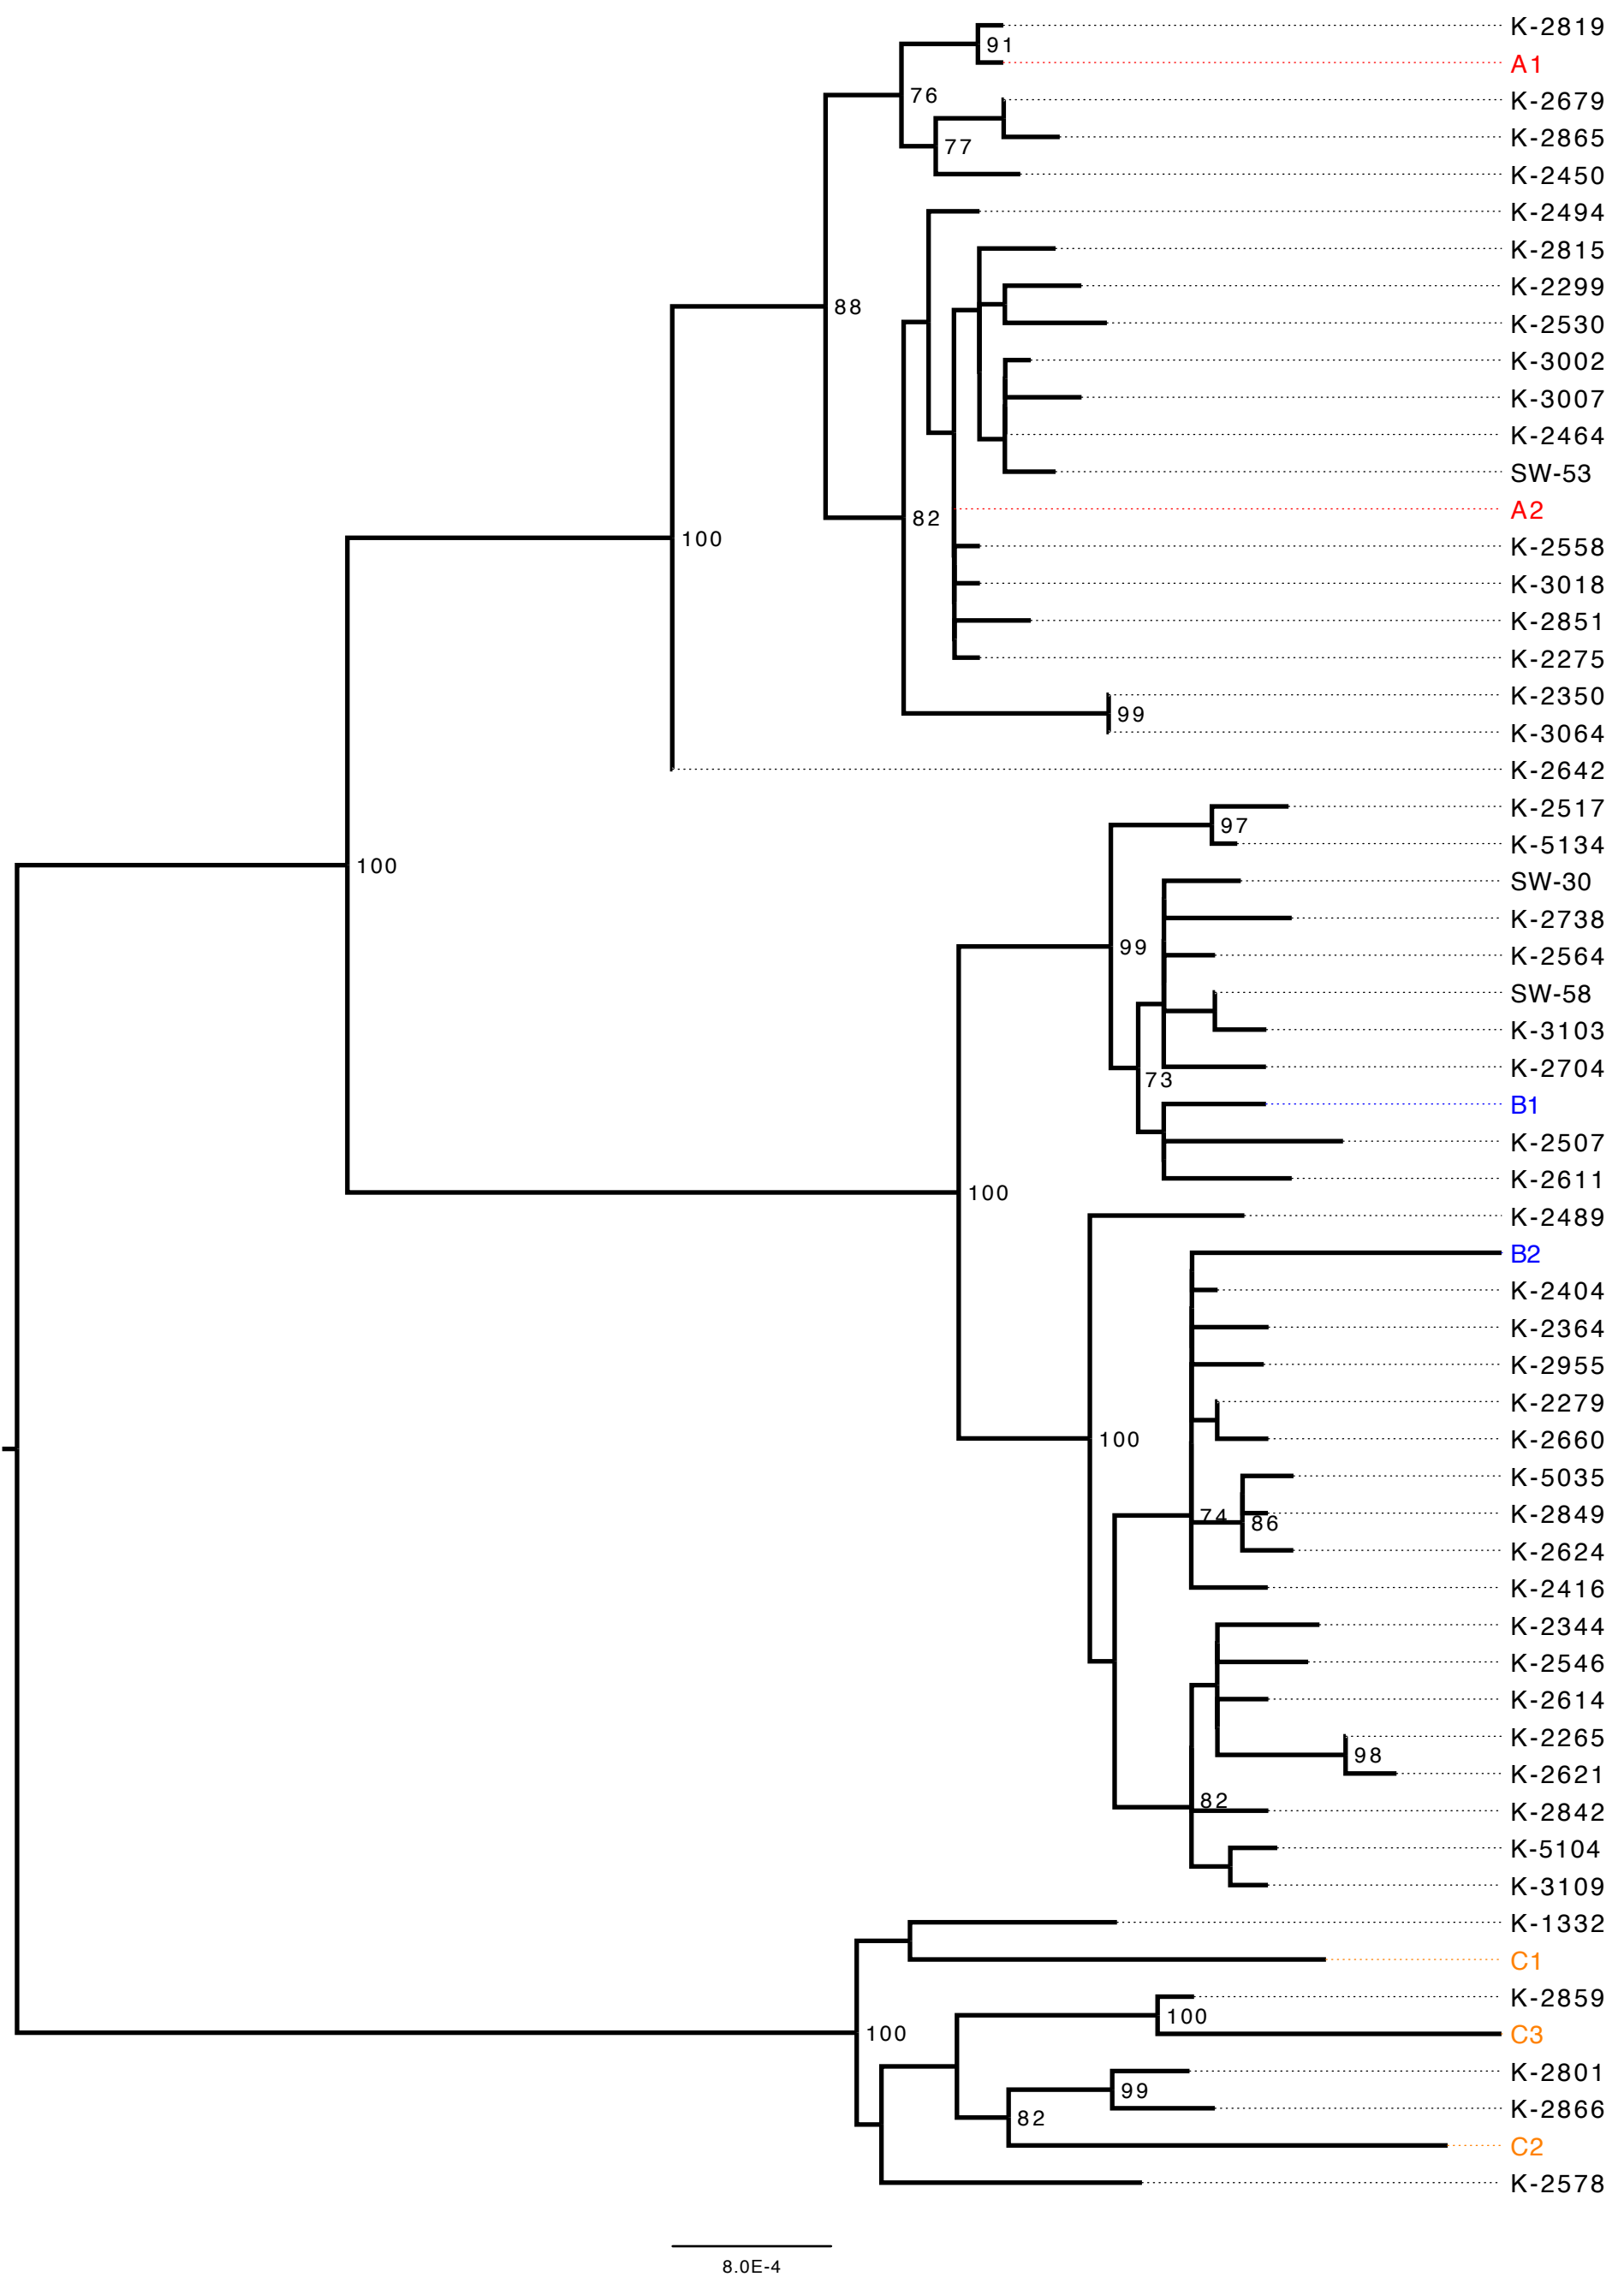

**Figure S1.** Phylogenetic tree of HPV31 genome sequences of all isolates from Japan (n = 52). Bootstrap values >70% are displayed. Scale bar, nucleotide substitutions per site.
